# Supplementary material
Source: PubMed Central journal article supplement (PMC3696958)
Supplement: NIHMS389596-supplement-01.pdf [file NIHMS389596-supplement-01.pdf]

### **Supplementary figure 1.**

Cubic restricted splines depicting the association of PR interval and waist circumference in blacks (shown in black) and whites (shown in red) in the Atherosclerosis Risk in Communities Study. Dotted lines represent 95% confidence intervals surrounding the estimate.

### **Supplementary figure 2.**

Cubic restricted splines depicting the association of PR interval and waist circumference in blacks (shown in black) and whites (shown in red) in the Atherosclerosis Risk in Communities Study. Dotted lines represent 95% confidence intervals surrounding the estimate.
